# Supplementary material
Source: ML conference proceedings conference paper supplement (https://openaccess.thecvf.com/content/ICCV2021/html/Saporta_Multi-Target_Adversarial_Frameworks_ICCV_2021_paper.html)
Supplement: Supplementary file 1 [file Saporta_Multi-Target_Adversarial_Frameworks_ICCV_2021_supplemental.pdf]

# Supplementary Material: Multi-Target Adversarial Frameworks for Domain Adaptation in Semantic Segmentation

Antoine Saporta<sup>1,2</sup>

Tuan-Hung Vu<sup>2</sup>

Matthieu Cord<sup>1,2</sup>

Patrick Pérez<sup>2</sup>

<sup>1</sup>Sorbonne University

<sup>2</sup>Valeo.ai

{antoine.saporta, tuan-hung.vu, matthieu.cord, patrick.perez}@valeo.com

## 1. Mapping Classes to Super Classes

Tabs. 1, 2, 3 and 4 present how the original classes in the 4 considered datasets are mapped to 7 shared super classes.

| Name                 | Orig. Id | Used? | Label        |
|----------------------|----------|-------|--------------|
| unlabeled            | 0        |       | void         |
| ego vehicle          | 1        |       | void         |
| rectification border | 2        |       | void         |
| out of roi           | 3        |       | void         |
| static               | 4        |       | void         |
| dynamic              | 5        |       | void         |
| ground               | 6        |       | void         |
| road                 | 7        | ✓     | flat         |
| sidewalk             | 8        | ✓     | flat         |
| parking              | 9        |       | flat         |
| rail track           | 10       |       | flat         |
| building             | 11       | ✓     | construction |
| wall                 | 12       | ✓     | construction |
| fence                | 13       | ✓     | construction |
| guard rail           | 14       |       | construction |
| bridge               | 15       |       | construction |
| tunnel               | 16       |       | construction |
| pole                 | 17       | ✓     | object       |
| polegroup            | 18       |       | object       |
| traffic light        | 19       | ✓     | object       |
| traffic sign         | 20       | ✓     | object       |
| vegetation           | 21       | ✓     | nature       |
| terrain              | 22       | ✓     | nature       |
| sky                  | 23       | ✓     | sky          |
| person               | 24       | ✓     | human        |
| rider                | 25       | ✓     | human        |
| car                  | 26       | ✓     | vehicle      |
| truck                | 27       | ✓     | vehicle      |
| bus                  | 28       | ✓     | vehicle      |
| caravan              | 29       |       | vehicle      |
| trailer              | 30       |       | vehicle      |
| train                | 31       | ✓     | vehicle      |
| motorcycle           | 32       | ✓     | vehicle      |
| bicycle              | 33       | ✓     | vehicle      |
| license plate        | -1       |       | vehicle      |

Table 1: **Mapping classes of Cityscapes.** First two columns: names and ids of original classes; Third column: indication of the use or not of a class during training and test; Last column: Super classes that are mapped to.

| Name          | Orig. Id | Used? | Label        |
|---------------|----------|-------|--------------|
| road          | 0        | ✓     | flat         |
| sidewalk      | 1        | ✓     | flat         |
| building      | 2        | ✓     | construction |
| wall          | 3        | ✓     | construction |
| fence         | 4        | ✓     | construction |
| pole          | 5        | ✓     | object       |
| traffic light | 6        | ✓     | object       |
| traffic sign  | 7        | ✓     | object       |
| vegetation    | 8        | ✓     | nature       |
| terrain       | 9        | ✓     | nature       |
| sky           | 10       | ✓     | sky          |
| person        | 11       | ✓     | human        |
| rider         | 12       | ✓     | human        |
| car           | 13       | ✓     | vehicle      |
| truck         | 14       | ✓     | vehicle      |
| bus           | 15       | ✓     | vehicle      |
| train         | 16       | ✓     | vehicle      |
| motorcycle    | 17       | ✓     | vehicle      |
| bicycle       | 18       | ✓     | vehicle      |
| unlabeled     | -1       |       | void         |

Table 2: **Mapping classes of GTA5.** Organization as in Table 1.

| Name                     | Orig. Id | Used? | Label        |
|--------------------------|----------|-------|--------------|
| bird                     | 0        |       | other        |
| ground animal            | 1        |       | other        |
| curb                     | 2        | ✓     | construction |
| fence                    | 3        | ✓     | construction |
| guard rail               | 4        | ✓     | construction |
| barrier                  | 5        | ✓     | construction |
| wall                     | 6        | ✓     | construction |
| bike lane                | 7        | ✓     | flat         |
| crosswalk - plain        | 8        | ✓     | flat         |
| curb cut                 | 9        | ✓     | flat         |
| parking                  | 10       | ✓     | flat         |
| pedestrian area          | 11       | ✓     | flat         |
| rail track               | 12       | ✓     | flat         |
| road                     | 13       | ✓     | flat         |
| service lane             | 14       | ✓     | flat         |
| sidewalk                 | 15       | ✓     | flat         |
| bridge                   | 16       | ✓     | construction |
| building                 | 17       | ✓     | construction |
| tunnel                   | 18       | ✓     | construction |
| person                   | 19       | ✓     | human        |
| bicyclist                | 20       | ✓     | human        |
| motorcyclist             | 21       | ✓     | human        |
| other rider              | 22       | ✓     | human        |
| lane marking - crosswalk | 23       | ✓     | flat         |
| lane marking - general   | 24       | ✓     | flat         |
| mountain                 | 25       |       | nature       |
| sand                     | 26       |       | nature       |
| sky                      | 27       | ✓     | sky          |
| snow                     | 28       |       | nature       |
| terrain                  | 29       | ✓     | flat         |
| vegetation               | 30       | ✓     | nature       |
| water                    | 31       |       | nature       |
| banner                   | 32       |       | object       |
| bench                    | 33       |       | object       |
| bike rack                | 34       |       | object       |
| billboard                | 35       |       | object       |
| catch basin              | 36       |       | object       |
| cctv camera              | 37       |       | object       |
| fire hydrant             | 38       |       | object       |
| junction box             | 39       |       | object       |
| mailbox                  | 40       |       | object       |
| manhole                  | 41       |       | object       |
| phone booth              | 42       |       | object       |
| pothole                  | 43       | ✓     | object       |
| street light             | 44       | ✓     | object       |
| pole                     | 45       | ✓     | object       |
| traffic sign frame       | 46       | ✓     | object       |
| utility pole             | 47       | ✓     | object       |
| traffic light            | 48       | ✓     | object       |
| traffic sign (back)      | 49       | ✓     | object       |
| traffic sign (front)     | 50       | ✓     | object       |
| trash can                | 51       |       | object       |
| bicycle                  | 52       | ✓     | vehicle      |
| boat                     | 53       | ✓     | vehicle      |
| bus                      | 54       | ✓     | vehicle      |
| car                      | 55       | ✓     | vehicle      |
| caravan                  | 56       | ✓     | vehicle      |
| motorcycle               | 57       | ✓     | vehicle      |
| on rails                 | 58       | ✓     | vehicle      |
| other vehicle            | 59       | ✓     | vehicle      |
| trailer                  | 60       | ✓     | vehicle      |
| truck                    | 61       | ✓     | vehicle      |
| wheeled slow             | 62       | ✓     | vehicle      |
| car mount                | 63       |       | void         |
| ego vehicle              | 64       |       | void         |
| unlabeled                | -1       |       | void         |

Table 3: Mapping classes of Mapillary Vistas. Organization as in Table 1.

| Name                  | Orig. Id | Used? | Label        |
|-----------------------|----------|-------|--------------|
| road                  | 0        | ✓     | flat         |
| parking               | 1        |       | flat         |
| drivable fallback     | 2        | ✓     | flat         |
| sidewalk              | 3        | ✓     | flat         |
| rail track            | 4        |       | flat         |
| non-drivable fallback | 5        |       | flat         |
| person                | 6        | ✓     | human        |
| animal                | 7        |       | other        |
| rider                 | 8        | ✓     | human        |
| motorcycle            | 9        | ✓     | vehicle      |
| bicycle               | 10       | ✓     | vehicle      |
| autorickshaw          | 11       | ✓     | vehicle      |
| car                   | 12       | ✓     | vehicle      |
| truck                 | 13       | ✓     | vehicle      |
| bus                   | 14       | ✓     | vehicle      |
| caravan               | 15       | ✓     | vehicle      |
| trailer               | 16       | ✓     | vehicle      |
| train                 | 17       | ✓     | vehicle      |
| vehicle fallback      | 18       | ✓     | vehicle      |
| curb                  | 19       | ✓     | construction |
| wall                  | 20       | ✓     | construction |
| fence                 | 21       | ✓     | construction |
| guard rail            | 22       |       | construction |
| billboard             | 23       | ✓     | object       |
| traffic sign          | 24       | ✓     | object       |
| traffic light         | 25       | ✓     | object       |
| pole                  | 26       | ✓     | object       |
| polegroup             | 27       |       | object       |
| obs-str-bar-fallback  | 28       |       | object       |
| building              | 29       | ✓     | construction |
| bridge                | 30       |       | construction |
| tunnel                | 31       |       | construction |
| vegetation            | 32       | ✓     | nature       |
| sky                   | 33       | ✓     | sky          |
| fallback background   | 34       |       | object       |
| unlabeled             | 35       |       | void         |
| ego vehicle           | 36       |       | void         |
| rectification border  | 37       |       | void         |
| out of roi            | 38       |       | void         |
| license plate         | 39       |       | vehicle      |

Table 4: Mapping classes of IDD. Organization as in Table 1.
